# Supplementary material
Source: publisher figshare collection journal article supplement (https://gsajournals.figshare.com/ndownloader/files/22620185)
Supplement: Supplementary file 1 [file 22620185]

Plant number	1	2	3	4	5	6	7	8	9	10	11	12	13	14	15	16	17	18	19	20	21	22	23	24	25	26	27	28	29	30	31	32	33	34	35	36	37	38	39	40	41	42	43	44	45	46	47	48	49
umc1904	2	1	1	2	1	0	0	1	2	2	1	1	1	1	2	1	1	0	0	1	2	0	1	2	0	2	1	2	0	1	2	2	1	0	0	1	2	2	2	1	1	2	2	2	1	0	1	1	0
umc2075	2	1	1	2	1	0	0	1	2	2	1	1	0	1	2	1	1	0	0	1	2	0	1	2	0	2	1	2	1	1	2	2	1	0	0	1	2	2	2	1	2	2	2	2	1	0	0	1	0
M8-122	1	1	1	1	1	0	1	1	2	2	0	1	0	1	2	1	1	0	1	1	2	0	1	2	0	1	1	2	1	1	2	2	1	0	0	2	2	2	2	1	2	1	2	2	1	1	0	0	0
M8-129	1	1	0	1	1	0	1	1	2	2	0	1	0	1	2	1	1	0	1	1	2	0	1	2	0	1	1	2	1	1	2	2	1	0	0	2	2	2	2	1	2	1	2	2	1	1	0	0	0
bnlg2181	1	1	0	1	1	0	1	1	2	2	0	1	0	2	2	1	1	0	1	1	1	0	1	2	0	1	1	2	1	1	2	2	1	0	0	1	1	2	2	1	2	1	2	2	1	1	0	0	0
M8-147	1	1	0	1	1	0	1	1	2	2	0	1	0	2	2	1	1	0	1	1	1	0	1	2	0	1	1	2	1	1	2	2	1	0	0	1	1	2	2	1	2	1	2	2	1	1	0	0	0
M8-155	1	1	0	1	1	1	1	1	1	2	0	0	0	2	2	0	1	0	1	1	1	1	1	2	0	1	1	2	1	1	1	2	1	1	0	1	1	2	1	1	2	1	2	2	1	1	0	0	0
bnlg1152	2	2	0	1	1	1	1	1	1	2	0	0	0	2	2	0	1	0	1	1	0	1	1	2	0	1	1	2	1	1	1	2	1	1	0	1	0	2	1	0	2	1	2	2	1	1	1	0	0
bnlg1065	2	1	1	0	1	1	1	1	1	2	0	0	1	2	2	0	1	0	1	1	0	1	1	2	0	1	1	2	1	1	1	2	1	2	0	1	0	2	0	0	2	2	0	2	1	1	1	1	0
umc1384	2	1	1	0	2	2	1	1	0	2	1	1	1	2	2	0	1	0	1	1	1	1	1	2	2	2	1	2	0	2	1	2	1	2	0	0	0	2	0	0	2	2	0	2	1	0	1	2	0
phi2333376	2	1	1	0	1	2	1	1	1	1	2	1	1	2	2	0	1	0	1	1	1	1	1	2	2	1	2	2	0	2	0	1	1	2	2	0	1	2	0	0	2	2	0	1	1	0	2	2	1
CHuangzaosi is coded as 2, heterozygote F1 is coded as 1, and A619 is coded as 0.
[truncated: 900 more columns]
